# Supplementary material for: Genetically Regulated Gene Expression in the Brain Associated With Chronic Pain: Relationships With Clinical Traits and Potential for Drug Repurposing
Source: PubMed Central journal article supplement — Biol Psychiatry. Author manuscript; Available in PMC 2024 Apr 15. (PMC10924073; doi:10.1016/j.biopsych.2023.08.023), 2023-09-09
Supplement: NIHMS1949313-supplement-1.pdf [file NIHMS1949313-supplement-1.pdf]

## SUPPLEMENTARY INFORMATION

# Genetically-Regulated Gene Expression in the Brain Associated With Chronic Pain: Relationships With Clinical Traits and Potential for Drug Repurposing

Johnston *et al.*

### S-PrediXcan

Transcriptomic Imputation (TI) involves using a reference dataset where gene expression (RNA-seq) and genotype data is available for the same individuals (e.g. the Genotype-Tissue Expression (GTEx) project) to build tissue-specific predictor models. These predictor models can then be used to predict (impute) genetically-regulated gene expression (GREX) in a separate cohort of individuals where genotyping data is available. These imputed GREX values can then be tested for association with a trait of interest in a transcriptome-wide association study (TWAS). A range of different TI methods are available, of which S-PrediXcan is one. S-PrediXcan (1) is an extension of PrediXcan (2) where individual-level data is not needed—PrediXcan models use elastic net regression to choose and weight SNPs associated with gene expression to include in any given GREX predictor model, which are then used to predict the transcriptome. Then regression coefficients of the trait of interest on imputed GREX for each gene is calculated. In contrast, S-PrediXcan directly computes the gene-level association results, using GWAS summary statistic output. We compare the formulae for PrediXcan and S-PrediXcan (adapted from (1)) below to illustrate this difference.

$$T_g = \sum_{l \in Model} w_{lg} X_l$$

Formula 1: PrediXcan calculation of predicted transcriptome (TI).  $W_{lg}$  = predictor model weights,  $X_l$  = genotype.

$$Y = T_g \gamma + \varepsilon$$

Formula 2: A second step and phenotype information is needed to perform TWAS (test for trait Y association with predicted transcriptome) and give gene-level association results.  $T_g$  = imputed transcriptome.

$$Z_g \approx \sum_{l \in Model} w_{lg} \frac{\sigma_L}{\sigma_G} \frac{\beta_L}{SE(\beta)}$$

Formula 3: S-PrediXcan directly computes gene level association results ( $Z_g$ ) without need for individual-level information.  $\frac{\sigma_L}{\sigma_G}$  = reference genotype dataset (e.g. 1000 Genomes), which replaces the need for

genotype data ( $X_i$  in formula 1),  $\frac{\beta_L}{SE(\beta)}$  = GWAS summary results Z scores, replacing individual-level phenotype information.

### FUMA GENE2FUNC

FUMA (Functional Mapping and Annotation of Genome-Wide Association Studies) (3) is a web-based suite of tools for use in characterizing and prioritizing findings from GWAS summary statistics. The subset of tools within GENE2FUNC, a division of FUMA, specifically takes gene-level results as input, and this is what we use in this study to further characterize our 89 unique significant gene findings from S-PrediXcan analysis. Gene set enrichment refers to testing for overrepresentation of classes of genes compared to what would be expected by chance. FUMA performs hypergeometric tests to test if genes of interest (our 89 gene findings) are overrepresented in pre-defined gene sets. These gene set definitions are from MsigDB (4,5), Wikipathways (6), and reported genes from the GWAS catalog (7), and multiple testing correction is performed within category. Hypergeometric testing involves using the hypergeometric distribution to calculate probability of ‘successes’ from a specific sample size, approximating to a Fisher’s exact test. In practice this can be viewed as a 2x2 table:

|                 | Not MCP-GREX gene | MCP-GREX gene |
|-----------------|-------------------|---------------|
| In gene set     | A                 | C             |
| Not in gene set | B                 | D             |

Whether the value C (number of our gene findings that are in the gene set, e.g., positional gene set chr3p21) is an overrepresentation (enrichment) can then be determined through calculating a p value using the hypergeometric distribution. Choosing ‘background genes’ as part of FUMA input, as described in the main manuscript, allows us to populate the first column. For FUMA GENE2FUNC tutorial see also <https://fuma.ctglab.nl/tutorial#gene2func> .

### DrugBank

Another tool available in FUMA GENE2FUNC is automatic searches of DrugBank (9), giving information on whether genes of interest are also annotated as drug targets, and if so which medications or compounds are associated with each gene. DrugBank provides information of FDA-approved drugs in addition to drugs currently undergoing FDA approval processes, and as of 2018 more than 4,000 drug targets (including proteins, DNA, and RNA) are included in the database. FUMA assigns DrugBank drug identification number(s) to gene results if the UniProt ID (i.e., protein product of the gene) is listed as one of the targets of the drug.

### Connectivity Map (CMap) Analysis

To query CMap L1000 (gene expression) and search for perturbation signatures (e.g., gene expression patterns) with significant connectivity score, two lists of genes must be prepared. The first list is genes up-regulated in the trait of interest, and the second is genes down-regulated in the trait of interest. Query results include results for all perturbagens (i.e., not just drug compounds), and for all connectivity score magnitude (i.e., non-significant results). We retained results for perturbation type ‘compound’, that passed internal CMap quality control, that had a connectivity score significantly different from the null, and that had a known mechanism of action/ non-missing mechanism of action information. A connectivity score represents the similarity between perturbation signatures, and ranges from -1 to 1. A perturbagen with a raw connectivity score of 1 therefore ‘matches’ MCP associated gene expression changes perfectly, and a perturbagen with a negative connectivity score suggests the compound may have therapeutic potential in chronic pain as it represents an ‘opposite’ gene expression change profile to chronic pain.

Input gene lists for CMap query may be reduced before query submission, as genes must have valid Entrez IDs and be present within the database search space. In the table below we indicate genes in the up

and down-regulated lists and whether they were included in the final query. All genes except one (NUP43) were included in a single list as direction of effect (up or down regulation) was consistent across tissues in S-PrediXcan analyses. NUP43 was both up and down-regulated, and so was excluded from the query.

### **PheWAS**

Phenome-wide association study (pheWAS) is a method for testing for association between a trait of interest, which can be genetic, gene-expression based, or phenotypic, and many phenotypic traits simultaneously (the phenome). This can be thought of as a ‘reverse’ of GWAS, with each individual component of the phenome representing a single SNP, and the trait of interest (e.g., MCP-GREX) representing the GWAS phenotype. In our analyses we impute MCP-GREX in 13 brain tissues and whole blood for BioMe participants, and test for association between this value and our phenome (consisting of 1,000+ phecodes), using the pheWAS R package (10) with adjustment for age, sex, and the first five genotype-derived principal components. For recent review of pheWAS methods in general see (11).

### **Summary Transcriptome Wide Association (S-TWAS) Analysis**

To attempt replication of our S-PrediXcan findings, we carried out S-TWAS (12). S-TWAS is a different method by which elastic net models are applied to summary statistics to identify genes where cis-regulated expression is associated with complex traits. This was carried out using the FUSION software package (Gusev et al), 1000 Genomes reference data, and the pre-computed predictive models for GTEx v8 brain tissue and whole blood available at <http://gusevlab.org/projects/fusion/>. We included models for genes with significant heritability and for all populations as recommended (see <http://gusevlab.org/projects/fusion/> section: GTEx v8 multi-tissue expression) and retained results where the model applied was an elastic net and genes were not within the MHC region. We then applied Bonferroni correction within-tissue as in the main analysis, finding 97 unique gene-tissue associations comprised of 57 unique genes. 43/229 of our significant S-PrediXcan gene-tissue associations have an available gene-tissue model in S-TWAS; of these, we replicate 39 / 43 gene-tissue associations at the tissue-wide significance level, all with consistent direction of effect between the two analyses. At the experiment-wide significance level, 17 / 18 experiment-wide-significant gene-tissue associations are replicated in S-TWAS analyses. We carried out a Fisher’s exact test that indicated significant levels of enrichment of S-PrediXcan gene-tissue associations in S-TWAS results ( $p < 2.2 \times 10^{-16}$ ).

### **Brain regions implicated in pain**

The ‘neuromatrix’ a.k.a. ‘pain matrix’, first described by Melzack (13), encompasses a large network of brain regions that respond to painful stimuli – this network includes the insula, thalamus, somatosensory cortex, and the anterior cingulate cortex. However, pain processing, and the development of chronic pain, have been associated with a much wider range of brain regions. It is also important to note that many studies in pain and the brain include study of nociception, of noxious stimuli responses, of acute and potentially induced pain, of emotional and psychological factors associated with pain and chronic pain, the study of specific chronic pain condition states, and studies in rodents. Recent detailed review can be found at (14–18), along with recent IASP redefinition of pain to emphasize its distinction from nociception alone (19).

Noxious stimuli result in transmission from nociceptors to the dorsal horn through primary afferent A delta and C fibres, with this information eventually making its way to the dorsal horn, then on to the thalamus, then eventually the somatosensory cortex and periaqueductal gray (reviewed by (20)). Already, ‘pain’ regions of the brain, even just those associated with nociception (a small factor in the chronic pain experience), can then be listed as the dorsal horn, thalamus, all regions in the somatosensory cortex (Brodmann’s areas 3a, 3b, 1 and 2), and the periaqueductal gray. Nociceptive information is then transmitted to higher-order regions associated with affective aspects of pain, and with memory, including the amygdala (21), hypothalamus (22), anterior cingulate cortex (23), prefrontal cortex (24), and nucleus

accumbens (25). Other higher brain regions implicated in pain processing, pain perception, and emotional aspects of (acute) pain, include the insular cortex (26), cerebellum (27), and the ventral tegmental area (28,29).

Chronic and persistent pain more specifically are also associated with many different brain regions. The cerebellum has been implicated in imaging studies of migraine (30), and connectivity between the hypothalamus and limbic system was found to be altered in fibromyalgia (31). Across a range of chronic pain conditions, regions including the prefrontal cortex, anterior cingulate cortex, insula, and thalamus were found to show decreased grey matter volume (reviewed by (32)), and development of chronic low back pain has been associated with shift from nociceptive to emotional brain network involvement in imaging studies (33). In studies of mice changes in gene expression in the insula, hippocampus, and amygdala were associated with endometriosis (34), and in regions including the nucleus accumbens and putamen changes in gray matter volume were associated with Complex Regional Pain Syndrome (CRPS) (35).

Finally, changes and disruption across networks spanning the entire brain have also been implicated in chronic pain (reviewed by (17)), including reorganization of the default mode network across different chronic pain conditions (36). Although GTEx contains samples from 13 brain regions total, all of which have been previously implicated in pain, if not chronic pain, increasing the number of different brain regions sampled would provide greater insight when studying chronic pain, in line with the wide range of brain regions and widespread disruption associated with chronic pain.

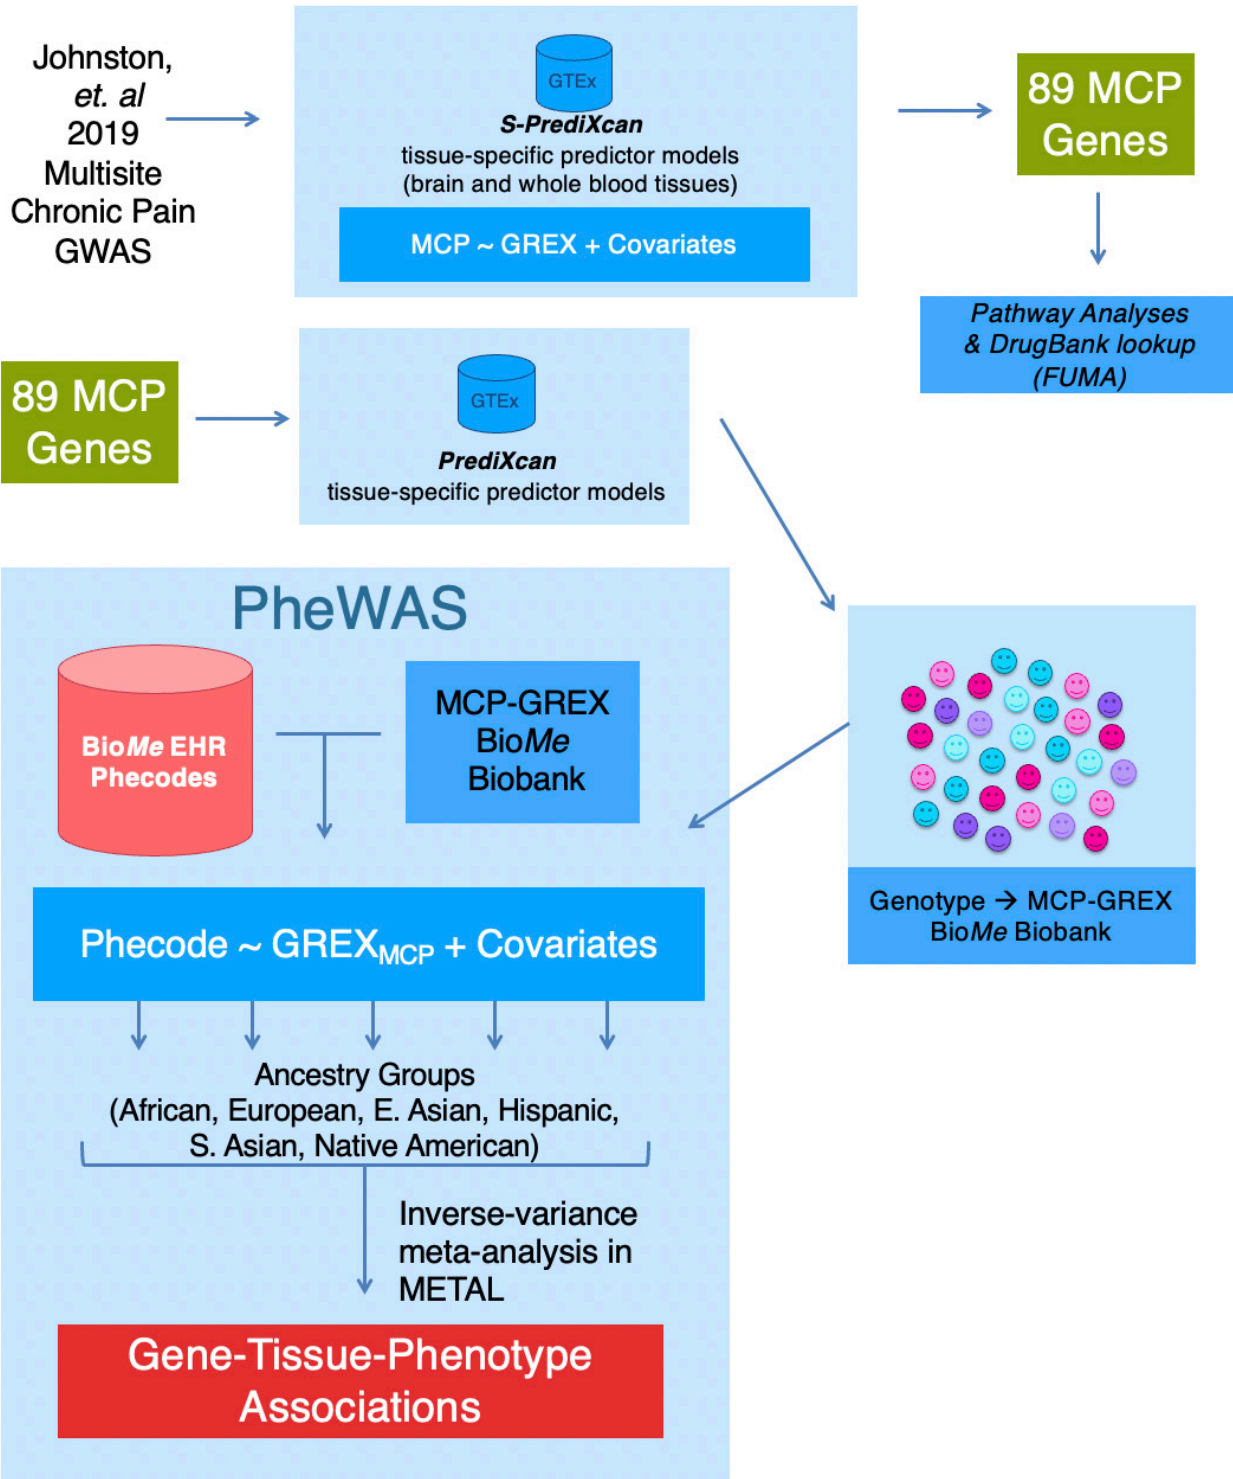

Figure S1: Schematic showing how analyses were combined.

| <b>Tissue</b>                   | <b>p-value Threshold</b> |
|---------------------------------|--------------------------|
| Amygdala                        | 1.79x10 <sup>-05</sup>   |
| Anterior cingulate cortex BA24  | 1.41 x10 <sup>-05</sup>  |
| Caudate basal ganglia           | 9.99 x10 <sup>-06</sup>  |
| Cerebellar Hemisphere           | 8.69 x10 <sup>-06</sup>  |
| Cerebellum                      | 7.36 x10 <sup>-06</sup>  |
| Cortex                          | 9.09 x10 <sup>-06</sup>  |
| Frontal Cortex BA9              | 1.10 x10 <sup>-05</sup>  |
| Hippocampus                     | 1.36 x10 <sup>-05</sup>  |
| Hypothalamus                    | 1.37 x10 <sup>-05</sup>  |
| Nucleus accumbens basal ganglia | 1.03 x10 <sup>-05</sup>  |
| Putamen basal ganglia           | 1.13 x10 <sup>-05</sup>  |
| Spinal cord cervical c-1        | 1.54 x10 <sup>-05</sup>  |
| Substantia nigra                | 1.95 x10 <sup>-05</sup>  |
| Whole Blood                     | 6.89 x10 <sup>-06</sup>  |

**Table S1: Within-tissue p-value Bonferroni significance thresholds.**

| <b>up-regulated genes</b> | <b>down-regulated genes</b> |
|---------------------------|-----------------------------|
| <b>ECM1</b>               | <b>SNRPC</b>                |
| <b>TARS2</b>              | <b>SEMA3B</b>               |
| <b>GPX1</b>               | <b>AMT</b>                  |
| <b>GMPPB</b>              | <b>VPS33B</b>               |
| <b>CELSR3</b>             | RP11-24H2.3                 |
| <b>NMT1</b>               | <b>FUBP1</b>                |
| <b>RPRD2</b>              | <b>CSK</b>                  |
| C6orf106 (ILRUN)          | ZNF501                      |
| <b>UHRF1BP1</b>           | <b>RBM6</b>                 |
| <b>SDCCAG8</b>            | <b>MST1</b>                 |
| <b>SUOX</b>               | <b>RPS26</b>                |
| <b>RNF123</b>             | MRPS21                      |
| <b>GPR27</b>              | <b>P4HTM</b>                |
| <b>CEP170</b>             | <b>INTS1</b>                |
| <b>SP4</b>                | RP11-160H22.5               |
| <b>MON1B</b>              | <b>ZNF197</b>               |
| <b>PTK2</b>               | <b>CTBP2</b>                |
| <b>SLC25A13</b>           | <b>SEMA3F</b>               |

|                   |                 |
|-------------------|-----------------|
| <b>PRKAR2A</b>    | <b>NUDT18</b>   |
| <b>UFL1</b>       | <b>UBA7</b>     |
| <b>SCAMP2</b>     | C15orf57        |
| <b>TSKU</b>       | <b>ZNF35</b>    |
| <b>LANCL1</b>     | <b>MAU2</b>     |
| <b>GRK4</b>       | <b>ACADL</b>    |
| <b>MST1R</b>      | <b>PACSIN3</b>  |
| <b>KLHDC8B</b>    | <b>UBOX5</b>    |
| <b>TSPYL4</b>     | <b>HEXIM1</b>   |
| <b>LIN28B-AS1</b> | <b>KCNH2</b>    |
| <b>MPI</b>        | ERICH2          |
| <b>KNDC1</b>      | <b>LATS1</b>    |
| <b>GINM1</b>      | <b>DCAKD</b>    |
| <b>FASTKD5</b>    | AC007405.6      |
| <b>NELFA</b>      | <b>LLGL1</b>    |
| <b>PPP6C</b>      | SLC38A3         |
| <b>ZNF23</b>      | ZNF502          |
| <b>DNAH11</b>     | <b>RAD51</b>    |
| <b>BAK1</b>       | <b>URM1</b>     |
| <b>IL23A</b>      | FAM180B         |
| <b>DNMT3B</b>     | ACSF3           |
| <b>SCAI</b>       | RP11-147L13.11  |
| <b>CDK14</b>      | LINC01671       |
| <b>KIF3B</b>      | <b>CYB561D2</b> |
| RP11-147L13.8     | <b>COX11</b>    |
| S100A1            |                 |
| NUP43             | NUP43           |
| <b>SHMT1</b>      |                 |

**Table S2: Genes included in CMap query are shown in bold.**

| Ancestry Group    | N <sub>min</sub> | N <sub>max</sub> |
|-------------------|------------------|------------------|
| East Asian        | 732              | 846              |
| African American  | 6105             | 7514             |
| Southeast Asian   | 477              | 572              |
| Hispanic American | 8373             | 10324            |
| Native American   | 69               | 83               |
| European American | 8262             | 9483             |

**Table S3: Minimum and maximum sample sizes per ancestry group included in PheWas analyses.** Minimum and maximum sample sizes refer to the MCP-GREx-phecode association testing minimum and maximum number of participants. This varies as exclusion criteria vary per phecode.

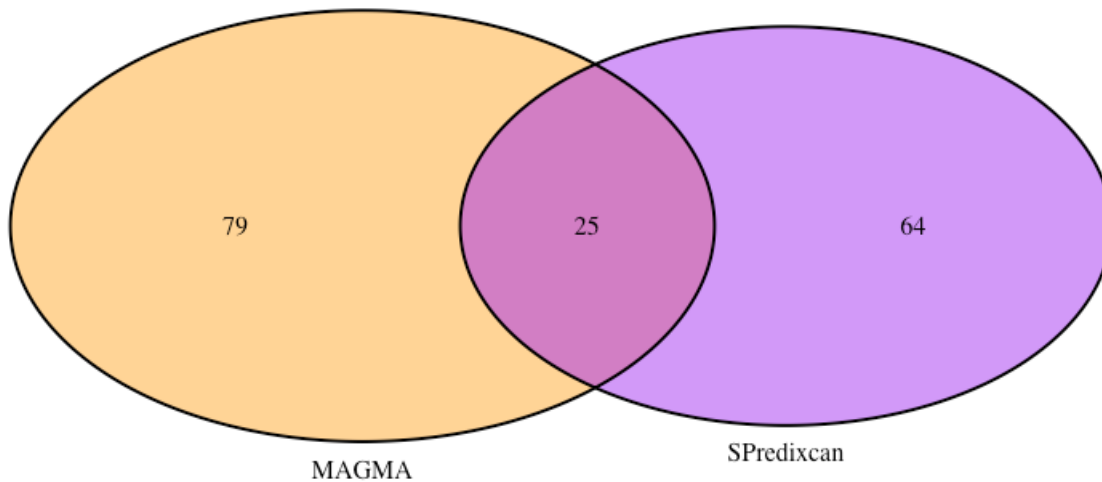

**Figure S2: Venn diagram of number of genes shared and distinct in S-PrediXcan results compared to MAGMA results.**



| <b>MAGMA</b> | <b>Shared</b> | <b>S-PrediXcan</b> |
|--------------|---------------|--------------------|
| BAI2         | MRPS21        | CELSR3             |
| PABPC4       | RPRD2         | SEMA3B             |
| FAM212B      | TARS2         | AMT                |
| PRPF3        | ECM1          | RP11-24H2.3        |
| RABGAP1L     | CEP170        | FUBP1              |
| AC092782.1   | SDCCAG8       | C6orf106 (ILRUN)   |
| NRXN1        | LANCL1        | CSK                |
| SLC4A10      | GPX1          | ZNF501             |
| CPS1         | RNF123        | SUOX               |
| ERBB4        | GMPPB         | MST1               |
| SPHKAP       | UBA7          | RPS26              |
| EOMES        | MST1R         | GPR27              |
| DHX30        | RBM6          | P4HTM              |
| ARIH2OS      | SEMA3F        | INTS1              |
| LAMB2        | SNRPC         | RP11-160H22.5      |
| CCDC71       | UHRF1BP1      | MON1B              |
| C3orf84      | NUP43         | ZNF197             |
| CCDC36       | SP4           | CTBP2              |
| RP11-3B7.1   | SLC25A13      | PTK2               |
| RHOA         | NUDT18        | PRKAR2A            |
| TCTA         | TSKU          | UFL1               |
| NICN1        | VPS33B        | SCAMP2             |
| DAG1         | DCAKD         | GRK4               |
| BSN          | NMT1          | C15orf57           |
| AMIGO3       | KIF3B         | KLHDC8B            |
| IP6K1        |               | TSPYL4             |
| CDHR4        |               | ZNF35              |
| TRAIP        |               | LIN28B-AS1         |
| CAMKV        |               | MAU2               |
| MON1A        |               | ACADL              |
| RBM5         |               | PACSIN3            |
| GNAT1        |               | MPI                |
| EIF4E3       |               | KNDC1              |
| ROBO2        |               | GINM1              |
| BBX          |               | FASTKD5            |
| MSL2         |               | UBOX5              |
| PCCB         |               | HEXIM1             |

|          |  |                |
|----------|--|----------------|
| STAG1    |  | KCNH2          |
| MAML3    |  | NELFA          |
| GABRB2   |  | ERICH2         |
| UQCC2    |  | LATS1          |
| IP6K3    |  | AC007405.6     |
| C6orf106 |  | PPP6C          |
| FHL5     |  | LLGL1          |
| LIN28B   |  | ZNF23          |
| FYN      |  | SLC38A3        |
| LAMA2    |  | ZNF502         |
| KATNA1   |  | DNAH11         |
| SDK1     |  | RAD51          |
| GRM3     |  | URM1           |
| FOXP2    |  | BAK1           |
| FAM120A  |  | FAM180B        |
| PHF2     |  | IL23A          |
| ASTN2    |  | DNMT3B         |
| DNM1     |  | SCAI           |
| EXD3     |  | CDK14          |
| MLLT10   |  | ACSF3          |
| ZRANB1   |  | RP11-147L13.8  |
| JAKMIP3  |  | RP11-147L13.11 |
| NCAM1    |  | LINC01671      |
| RERG     |  | CYB561D2       |
| EFNB2    |  | S100A1         |
| NUMB     |  | COX11          |
| PPP1R13B |  | SHMT1          |
| ATXN1L   |  |                |
| IST1     |  |                |
| ZNF821   |  |                |
| ACBD4    |  |                |
| HEXIM2   |  |                |
| C17orf58 |  |                |
| ASXL3    |  |                |
| DCC      |  |                |
| ILF3     |  |                |
| ATP13A1  |  |                |
| ZNF101   |  |                |
| SLC24A3  |  |                |

|           |  |  |
|-----------|--|--|
| TM9SF4    |  |  |
| ASXL1     |  |  |
| C20orf112 |  |  |

**Table S4: Genes shared and distinct in MAGMA results compared to S-PrediXcan results.**

| ENSGID          | Gene Symbol   | Tissue                          | Z (S-Pred.) | Z (S-TWAS) | P Raw (S-Pred.) | P Adj. (S-Pred.) | P Raw (S-TWAS) | P Adj. (S-TWAS) |
|-----------------|---------------|---------------------------------|-------------|------------|-----------------|------------------|----------------|-----------------|
| ENSG00000197728 | RPS26         | Amygdala                        | -4.71       | -4.8       | 2.53E-06        | 7.04E-03         | 1.57E-06       | 9.66E-04        |
| ENSG00000136448 | NMT1          | Anterior_cingulate_cortex_BA24  | 5.89        | 6.03       | 3.83E-09        | 1.35E-05         | 1.60E-09       | 1.39E-06        |
| ENSG00000197728 | RPS26         | Anterior_cingulate_cortex_BA25  | -4.84       | -4.82      | 1.27E-06        | 4.50E-03         | 1.43E-06       | 1.24E-03        |
| ENSG00000178802 | MPI           | Anterior_cingulate_cortex_BA26  | 4.5         | 4.48       | 6.76E-06        | 2.39E-02         | 7.62E-06       | 6.63E-03        |
| ENSG00000166260 | COX11         | Anterior_cingulate_cortex_BA27  | -4.39       | -4.39      | 1.11E-05        | 3.92E-02         | 1.15E-05       | 1.00E-02        |
| ENSG00000173540 | GMPPB         | Caudate_basal_ganglia           | 6.15        | 6.43       | 7.77E-10        | 3.88E-06         | 1.31E-10       | 1.77E-07        |
| ENSG00000197728 | RPS26         | Caudate_basal_ganglia           | -4.94       | -4.92      | 7.80E-07        | 3.90E-03         | 8.48E-07       | 1.15E-03        |
| ENSG00000173540 | GMPPB         | Cerebellar_Hemisphere           | 6.07        | 5.92       | 1.30E-09        | 7.49E-06         | 3.28E-09       | 5.62E-06        |
| ENSG00000197728 | RPS26         | Cerebellar_Hemisphere           | -4.86       | -4.94      | 1.15E-06        | 6.62E-03         | 7.83E-07       | 1.34E-03        |
| ENSG00000115365 | LANCL1        | Cerebellar_Hemisphere           | 4.49        | 4.75       | 6.97E-06        | 4.00E-02         | 1.99E-06       | 3.41E-03        |
| ENSG00000233276 | GPX1          | Cerebellum                      | 5.23        | 6.53       | 1.69E-07        | 1.15E-03         | 6.53E-11       | 1.40E-07        |
| ENSG00000197728 | RPS26         | Cerebellum                      | -5.15       | -5.02      | 2.58E-07        | 1.75E-03         | 5.17E-07       | 1.11E-03        |
| ENSG00000139531 | SUOX          | Cerebellum                      | 5.03        | 5.15       | 4.88E-07        | 3.31E-03         | 2.63E-07       | 5.62E-04        |
| ENSG00000164068 | RNF123        | Cerebellum                      | 4.94        | 5.05       | 7.94E-07        | 5.38E-03         | 4.37E-07       | 9.34E-04        |
| ENSG00000266472 | MRPS21        | Cerebellum                      | -4.92       | -4.64      | 8.86E-07        | 6.01E-03         | 3.49E-06       | 7.46E-03        |
| ENSG00000172992 | DCAKD         | Cerebellum                      | -4.52       | -4.43      | 6.25E-06        | 4.24E-02         | 9.33E-06       | 1.99E-02        |
| ENSG00000173540 | GMPPB         | Cortex                          | 5.9         | 6.32       | 3.53E-09        | 1.94E-05         | 2.66E-10       | 4.10E-07        |
| ENSG00000197728 | RPS26         | Cortex                          | -4.9        | -4.9       | 9.78E-07        | 5.37E-03         | 9.44E-07       | 1.45E-03        |
| ENSG00000115365 | LANCL1        | Cortex                          | 4.8         | 5.66       | 1.59E-06        | 8.74E-03         | 1.51E-08       | 2.33E-05        |
| ENSG00000233276 | GPX1          | Frontal_Cortex_BA9              | 6.25        | 6.29       | 4.03E-10        | 1.84E-06         | 3.10E-10       | 3.79E-07        |
| ENSG00000197728 | RPS26         | Frontal_Cortex_BA10             | -5.28       | -4.94      | 1.30E-07        | 5.91E-04         | 7.66E-07       | 9.37E-04        |
| ENSG00000172992 | DCAKD         | Frontal_Cortex_BA11             | -4.58       | -4.21      | 4.68E-06        | 2.13E-02         | 2.56E-05       | 3.13E-02        |
| ENSG00000267731 | RP11-147L13.8 | Frontal_Cortex_BA12             | 4.47        | 4.58       | 7.96E-06        | 3.63E-02         | 4.63E-06       | 5.66E-03        |
| ENSG00000166260 | COX11         | Hippocampus                     | -4.37       | -4.54      | 1.27E-05        | 4.68E-02         | 5.70E-06       | 4.83E-03        |
| ENSG00000197728 | RPS26         | Hypothalamus                    | -4.87       | -4.93      | 1.11E-06        | 4.06E-03         | 8.29E-07       | 6.53E-04        |
| ENSG00000143369 | ECM1          | Nucleus_accumbens_basal_ganglia | 5.43        | 5.46       | 5.70E-08        | 2.76E-04         | 4.79E-08       | 6.35E-05        |
| ENSG00000233276 | GPX1          | Nucleus_accumbens_basal_ganglia | 4.96        | 5.24       | 7.03E-07        | 3.41E-03         | 1.57E-07       | 2.08E-04        |
| ENSG00000128891 | C15orf57      | Nucleus_accumbens_basal_ganglia | -4.76       | -4.4       | 1.93E-06        | 9.36E-03         | 1.09E-05       | 1.44E-02        |

|                 |          |                          |       |       |          |          |          |          |
|-----------------|----------|--------------------------|-------|-------|----------|----------|----------|----------|
| ENSG00000197728 | RPS26    | Putamen_basal_ganglia    | -5.24 | -4.9  | 1.64E-07 | 7.28E-04 | 9.52E-07 | 1.07E-03 |
| ENSG00000173540 | GMPPB    | Spinal_cord_cervical_c-1 | 5.97  | 5.81  | 2.40E-09 | 7.80E-06 | 6.20E-09 | 4.69E-06 |
| ENSG00000197728 | RPS26    | Substantia_nigra         | -4.54 | -4.61 | 5.54E-06 | 1.42E-02 | 3.96E-06 | 2.05E-03 |
| ENSG00000173540 | GMPPB    | Whole_Blood              | 5.95  | 5.79  | 2.70E-09 | 1.95E-05 | 7.10E-09 | 2.15E-05 |
| ENSG00000065060 | UHRF1BP1 | Whole_Blood              | 5.04  | 4.79  | 4.71E-07 | 3.42E-03 | 1.66E-06 | 5.03E-03 |
| ENSG00000004864 | SLC25A13 | Whole_Blood              | 4.94  | 5.05  | 7.66E-07 | 5.55E-03 | 4.37E-07 | 1.32E-03 |
| ENSG00000197728 | RPS26    | Whole_Blood              | -4.92 | -4.8  | 8.54E-07 | 6.19E-03 | 1.61E-06 | 4.88E-03 |
| ENSG00000004534 | RBM6     | Whole_Blood              | -4.86 | -4.85 | 1.15E-06 | 8.30E-03 | 1.21E-06 | 3.66E-03 |
| ENSG00000055211 | GINM1    | Whole_Blood              | 4.66  | 4.77  | 3.17E-06 | 2.30E-02 | 1.85E-06 | 5.60E-03 |
| ENSG00000172992 | DCAKD    | Whole_Blood              | -4.58 | -4.51 | 4.75E-06 | 3.44E-02 | 6.35E-06 | 1.92E-02 |
| ENSG00000167118 | URM1     | Whole_Blood              | -4.52 | -4.49 | 6.32E-06 | 4.58E-02 | 7.08E-06 | 2.14E-02 |

**Table S5: Tissue-wide significant gene-tissue findings in both S-PrediXcan and S-TWAS.** Z (S-Pred.) = Z score (S-PrediXcan), Z (S-TWAS) = Z score (S-TWAS), P Raw (S-Pred.) = unadjusted association p-value (S-PrediXcan), P Adj. (S-Pred.) = Bonferroni-corrected (within-tissue) p value (S-PrediXcan), P Raw (S-TWAS) = unadjusted association p value (S-TWAS), P Adj. (S-TWAS) = Bonferroni-corrected (within-tissue) p value (S-TWAS).

|                      | Significant (S-PrediXcan) | NS (S-PrediXcan) | TOTAL |
|----------------------|---------------------------|------------------|-------|
| Significant (S-TWAS) | 17                        | 17               | 34    |
| NS (S-TWAS)          | 1                         | 11823            | 11824 |
| TOTAL                | 18                        | 11840            | 11858 |

**Table S6: Contingency table for Fisher's exact test.** Significant = gene-tissue results with a p value less than the experiment-wide p value threshold for that analysis (S-PrediXcan or S-TWAS). NS = Non-significant gene-tissue results. Note a total of 11, 858 gene-tissue predictor models are shared between S-PrediXcan and S-TWAS, and this makes up the background in this test.

|                           | Significant MCP | NS MCP | Totals |
|---------------------------|-----------------|--------|--------|
| Significant Toikumo et al | 6               | 32     | 38     |
| NS Toikumo et al          | 37              | 11783  | 11820  |
| Totals                    | 43              | 11815  | 11858* |

**Table S7: Contingency table for Fisher's exact test.** \*Total number of gene-tissue associations with models available in both FUSION and S-PrediXcan. MCP = Multisite Chronic Pain (S-PrediXcan analyses), NS = non-significant. Thirty-eight gene-tissue associations from Toikumo et al have prediction models available in both S-PrediXcan and FUSION, and 43 of 229 significant gene-tissue associations for MCP in our analyses have a prediction model in both S-PrediXcan and FUSION.

| ENSGID          | Gene   | Tissue                               | SPrediXcan_Z | SPrediXcan_P | FUSION_Z | FUSION_P |
|-----------------|--------|--------------------------------------|--------------|--------------|----------|----------|
| ENSG00000173540 | GMPPB  | Brain_Cerebellar_Hemisphere          | 6.066939899  | 1.30E-09     | 4.92625  | 8.38E-07 |
| ENSG00000173540 | GMPPB  | Brain_Cortex                         | 5.904840509  | 3.53E-09     | 4.9262   | 8.38E-07 |
| ENSG00000233276 | GPX1   | Brain_Frontal_Cortex_BA9             | 6.252951146  | 4.03E-10     | 6.6838   | 2.33E-11 |
| ENSG00000164068 | RNF123 | Brain_Cerebellum                     | 4.936958906  | 7.94E-07     | 8.67813  | 4.02E-18 |
| ENSG00000197728 | RPS26  | Brain_Anterior_cingulate_cortex_BA24 | -4.844020429 | 1.27E-06     | -4.3525  | 1.35E-05 |
| ENSG00000197728 | RPS26  | Brain_Cortex                         | -4.896032857 | 9.78E-07     | -4.49495 | 6.96E-06 |

**Table S8: Significant gene-tissue results in MCP S-PrediXcan analyses also significant in FUSION TWAS by Toikumo et al.**

| Symbol | DrugBank Accession ID | Drug Name & Description                                                                    |
|--------|-----------------------|--------------------------------------------------------------------------------------------|
| AMT    | DB00116               | tetrahydrofolic acid, nutritional supplement                                               |
|        | DB00157               | NADH, nutritional supplement (some evidence for PD, CFS, AD, CVD benefit)                  |
|        | DB04789               | 5-methyltetrahydrofolic acid, nutritional supplement                                       |
| CSK    | DB01254               | dasatinib, tyrosine kinase inhibitor, cancer treatment (leukemia)                          |
|        | DB02010               | staurosporine, protein kinase C inhibitor                                                  |
|        | DB05075               | TG-100801, topically applied kinase inhibitor (macular degeneration)                       |
|        | DB12010               | fostamatinib, spleen tyrosine kinase inhibitor (thrombocytopenia)                          |
| FUBP1  | DB05786               | irofulven, novel anti-cancer compound                                                      |
| GPX1   | DB00143               | glutathione, nutritional supplement                                                        |
| IL23A  | DB05459               | briakinumab, anti-IL-12 monoclonal antibody for T-cell-driven autoimmune disease treatment |
|        | DB11834               | guselkumab, monoclonal antibody for plaque psoriasis                                       |
| KCNH2  | DB00176               | fluvoxamine, SSRI for OCD                                                                  |
|        | DB00199               | erythromycin, macrolide antibiotic                                                         |
|        | DB00204               | dofetilide, class 3 antiarrhythmic                                                         |
|        | DB00276               | amsacrine, cytotoxin for leukemia treatment                                                |
|        | DB00280               | disopyramide, class 1A antiarrhythmic                                                      |
|        | DB00308               | ibutilide, class 3 antiarrhythmic                                                          |

|         |                                                                                             |
|---------|---------------------------------------------------------------------------------------------|
| DB00342 | terfenadine, antihistamine                                                                  |
| DB00346 | alfuzosin, alpha-1 adrenergic antagonist                                                    |
| DB00455 | loratidine, 2nd generation antihistamine                                                    |
| DB00457 | prazosin, alpha-blocker for hypertension                                                    |
| DB00458 | imipramine, tricyclic antidepressant                                                        |
| DB00472 | fluoxetine, SSRI                                                                            |
| DB00477 | chlorpromazine, phenothiazine antipsychotic                                                 |
| DB00489 | sotalol, methane sulfoanilide beta adrenergic antagonist for arrhythmia                     |
| DB00537 | ciprofloxacin, second generation fluoroquinolone                                            |
| DB00590 | doxazosin, alpha-1 adrenergic receptor for hypertension                                     |
| DB00604 | cisapride, GERD-associated heartburn medication                                             |
| DB00637 | astemizole, second generation antihistamine                                                 |
| DB00661 | verapamil, non-dihydropyridine calcium channel blocker for angina, arrhythmia, hypertension |
| DB00675 | tamoxifen, selective estrogen receptor modulator used in certain breast cancers             |
| DB00679 | thioridazine, phenothiazine antipsychotic for GAD and schizophrenia                         |
| DB00908 | quinidine, arrhythmia treatment                                                             |
| DB01026 | ketoconazole, broad spectrum antifungal                                                     |
| DB01035 | procainamide, arrhythmia treatment                                                          |
| DB01074 | perhexiline, coronary vasodilator                                                           |
| DB01100 | pimozide, antipsychotic used in Tourette's                                                  |
| DB01110 | miconazole, azole antifungal                                                                |
| DB01118 | amiodarone, class 3 antiarrhythmic                                                          |
| DB01136 | carvedilol, non-selective beta-adrenergic antagonist                                        |
| DB01142 | doxepin, psychotropic agent with antidepressant and anxiolytic properties                   |
| DB01149 | nefazodone, antidepressant                                                                  |
| DB01162 | terazosin, alpha-1 adrenergic antagonist                                                    |
| DB01182 | propafenone, class 1c antiarrhythmic                                                        |
| DB01195 | flecainide, class 1c antiarrhythmic                                                         |
| DB01211 | clarithromycin, macrolide antibiotic                                                        |
| DB01218 | halofantrine, antimalarial                                                                  |
| DB01244 | bepidil, calcium channel blocker                                                            |
| DB04855 | dronedaron, antiarrhythmic                                                                  |
| DB04957 | azimilide, investigational class 3 antiarrhythmic                                           |
| DB06144 | sertindole, atypical antipsychotic                                                          |
| DB06217 | vernakalant, antiarrhythmic                                                                 |
| DB06457 | tecastemizole, investigational small molecule                                               |
| DB11090 | potassium nitrate, small wound cauterization                                                |
| DB11186 | pentoxifyverine, cough suppressant                                                          |

|                |         |                                                                             |
|----------------|---------|-----------------------------------------------------------------------------|
|                | DB11386 | chlorobutanol, alcohol-based preservative                                   |
|                | DB11633 | Isavuconazole, triazole antifungal                                          |
|                | DB11642 | pitolisant, antagonist of histamine H3 receptor, narcolepsy treatment       |
| LATS1          | DB12010 | fostamatinib, spleen tyrosine kinase inhibitor (thrombocytopenia)           |
| MST1R          | DB12010 | fostamatinib, spleen tyrosine kinase inhibitor (thrombocytopenia)           |
| NMT1           | DB03062 | investigational small molecule                                              |
| P4HTM          | DB00126 | vitamin C, nutritional supplement                                           |
| PRKAR2A        | DB05798 | GEM-231, monoclonal antibody                                                |
| PTK2           | DB06423 | endostatin, investigational small molecule                                  |
|                | DB07248 | investigational small molecule                                              |
|                | DB07460 | investigational small molecule                                              |
|                | DB12010 | fostamatinib, spleen tyrosine kinase inhibitor (thrombocytopenia)           |
| <b>RAD51</b>   | DB04395 | phosphoaminophosphonic acid-adenylate ester, investigational small molecule |
|                | DB12742 | amuvatinib, cancer treatment undergoing clinical trial                      |
| S100A1         | DB00768 | olopatadine, histamine H1 antagonist                                        |
| SHMT1          | DB00114 | pyridoxal phosphate (B6), nutritional supplement                            |
|                | DB00116 | tetrahydrofolic acid, nutritional supplement                                |
|                | DB00145 | glycine, total parenteral nutrition component                               |
|                | DB01055 | mimosine, antineoplastic                                                    |
|                | DB02067 | trigu-5-formyl-tetrahydrofolate, investigational small molecule             |
|                | DB02800 | 5-hydroxymethyl-5,6-dihydrofolic acid, investigational small molecule       |
|                | DB02824 | N-pyridoxyl-glycine-5-monophosphate, investigational small molecule         |
| SLC25A13       | DB00128 | aspartic acid, total parenteral nutrition component                         |
| <b>SLC38A3</b> | DB00117 | histidine, total parenteral nutrition component                             |
|                | DB00174 | asparagine, non-essential amino acid                                        |
| SUOX           | DB03983 | investigational small molecule                                              |
| TARS2          | DB00156 | threonine, total parenteral nutrition component                             |

**Table S9: DrugBank lookup results for 89 significant MCP-GREX genes.** PD = Parkinson disease, AD = Alzheimer disease, CFS = chronic fatigue syndrome, CVD = cardiovascular disease, OCD = obsessive compulsive disorder. Genes in **bold** were also found to be significant in PheWAS analyses.

| Gene             | Phecode Description                                           | Tissue                               | Zscore | P (FDR) | P (Raw)  | Ncase | Nctrl |
|------------------|---------------------------------------------------------------|--------------------------------------|--------|---------|----------|-------|-------|
| UFL1             | Pain and other symptoms associated with female genital organs | Brain Cerebellum                     | -4.44  | 0.0425  | 9.02E-06 | 14    | 7715  |
| SLC38A3          | Joint/ ligament sprain                                        | Brain Caudate basal ganglia          | 5.83   | 0.00001 | 5.69E-09 | 20    | 7810  |
| ERICH2           | Disc disorders                                                | Brain Amygdala                       | -5.05  | 0.0015  | 4.38E-07 | 738   | 17112 |
| Novel Transcript | Spondylosis with myelopathy                                   | Brain Anterior cingulate cortex BA24 | 4.55   | 0.0315  | 5.34E-06 | 140   | 17813 |
| Novel Transcript | Spondylosis with myelopathy                                   | Brain Cortex                         | 4.62   | 0.0315  | 3.87E-06 | 140   | 17813 |

**Table S10: PheWas results: mean pain score-adjusted.** P (Raw) = unadjusted p value, P (FDR) = FDR-adjusted p value, Ncase = N cases for phecode, Nctrl = N controls for phecode.

| Gene             | Phecode Description                 | Tissue                               | Zscore | P (FDR)  | P (Raw)  | Ncase | Nctrl |
|------------------|-------------------------------------|--------------------------------------|--------|----------|----------|-------|-------|
| PTK2             | Excessive or frequent menstruation  | Brain_Hypothalamus                   | 4.81   | 0.018    | 1.49E-06 | 393   | 17300 |
| SLC38A3          | Joint/ ligament sprain              | Brain_Caudate_basal_ganglia          | 5.86   | 1.10E-05 | 4.66E-09 | 20    | 7815  |
| ERICH2           | disc disorders                      | Brain_Amygdala                       | -5.18  | 0.00078  | 2.21E-07 | 738   | 17123 |
| ERICH2           | displacement of intervertebral disc | Brain_Amygdala                       | -4.22  | 0.043    | 2.41E-05 | 426   | 17311 |
| Novel Transcript | spondylosis with myelopathy         | Brain_Anterior_cingulate cortex BA24 | 4.54   | 0.033    | 5.53E-06 | 140   | 17824 |
| Novel Transcript | spondylosis with myelopathy         | Brain_Cortex                         | 4.61   | 0.033    | 4.05E-06 | 140   | 17824 |

**Table S11: PheWas results: matched sample for mean pain score-adjusted, without adjustment for mean pain score.** P (Raw) = unadjusted p value, P (FDR) = FDR-adjusted p value, Ncase = N cases for phecode, Nctrl = N controls for phecode.



## Supplementary References

1. Barbeira AN, Dickinson SP, Bonazzola R, Zheng J, Wheeler HE, Torres JM, et al. Exploring the phenotypic consequences of tissue specific gene expression variation inferred from GWAS summary statistics. *Nat Commun.* 2018 May 8;9(1):1825.
2. Gamazon ER, Wheeler HE, Shah KP, Mozaffari SV, Aquino-Michaels K, Carroll RJ, et al. A gene-based association method for mapping traits using reference transcriptome data. *Nat Genet.* 2015 Sep;47(9):1091–8.
3. Watanabe K, Taskesen E, van Bochoven A, Posthuma D. Functional mapping and annotation of genetic associations with FUMA. *Nat Commun.* 2017 Dec;8(1):1826.
4. Subramanian A, Tamayo P, Mootha VK, Mukherjee S, Ebert BL, Gillette MA, et al. Gene set enrichment analysis: A knowledge-based approach for interpreting genome-wide expression profiles. *Proceedings of the National Academy of Sciences.* 2005 Oct 25;102(43):15545–50.
5. Liberzon A, Birger C, Thorvaldsdóttir H, Ghandi M, Mesirov JP, Tamayo P. The Molecular Signatures Database (MSigDB) hallmark gene set collection. *Cell Syst.* 2015 Dec 23;1(6):417–25.
6. Martens M, Ammar A, Riutta A, Waagmeester A, Slenter DN, Hanspers K, et al. WikiPathways: connecting communities. *Nucleic Acids Research.* 2021 Jan 8;49(D1):D613–21.
7. Sollis E, Mosaku A, Abid A, Buniello A, Cerezo M, Gil L, et al. The NHGRI-EBI GWAS Catalog: knowledgebase and deposition resource. *Nucleic Acids Res.* 2023 Jan 6;51(D1):D977–85.
8. Toikumo S, Vickers-Smith R, Jinwala Z, Xu H, Saini D, Hartwell E, et al. The genetic architecture of pain intensity in a sample of 598,339 U.S. veterans [Internet]. medRxiv; 2023 [cited 2023 Jul 19]. p. 2023.03.09.23286958. Available from: <https://www.medrxiv.org/content/10.1101/2023.03.09.23286958v1>
9. Wishart DS, Feunang YD, Guo AC, Lo EJ, Marcu A, Grant JR, et al. DrugBank 5.0: a major update to the DrugBank database for 2018. *Nucleic Acids Res.* 2018 Jan 4;46(Database issue):D1074–82.
10. Bastarache L. Using Phecodes for Research with the Electronic Health Record: From PheWAS to PheRS. *Annu Rev Biomed Data Sci.* 2021 Jul 20;4(1):1–19.
11. Wang L, Zhang X, Meng X, Koskeridis F, Georgiou A, Yu L, et al. Methodology in phenome-wide association studies: a systematic review. 2021;58:720–8.
12. Gusev A, Ko A, Shi H, Bhatia G, Chung W, Penninx BWJH, et al. Integrative approaches for large-scale transcriptome-wide association studies. *Nat Genet.* 2016 Mar;48(3):245–52.
13. Melzack R. From the gate to the neuromatrix. *PAIN.* 1999 Aug;82:S121.
14. De Ridder D, Adhia D, Vanneste S. The anatomy of pain and suffering in the brain and its clinical implications. *Neuroscience & Biobehavioral Reviews.* 2021 Nov 1;130:125–46.
15. Yang S, Chang MC. Chronic Pain: Structural and Functional Changes in Brain Structures and Associated Negative Affective States. *Int J Mol Sci.* 2019 Jun 26;20(13):3130.

16. Farmer MA, Baliki MN, Apkarian AV. A dynamic network perspective of chronic pain. *Neuroscience Letters*. 2012 Jun 29;520(2):197–203.
17. Barroso J, Branco P, Apkarian AV. Brain mechanisms of chronic pain: critical role of translational approach. *Translational Research*. 2021 Dec;238:76–89.
18. Su Q, Song Y, Zhao R, Liang M. A review on the ongoing quest for a pain signature in the human brain. *Brain Science Advances*. 2019 Dec 1;5(4):274–87.
19. IASP Announces Revised Definition of Pain [Internet]. International Association for the Study of Pain (IASP). [cited 2022 Sep 20]. Available from: <https://www.iasp-pain.org/publications/iasp-news/iasp-announces-revised-definition-of-pain/>
20. Dubin AE, Patapoutian A. Nociceptors: the sensors of the pain pathway. *J Clin Invest*. 2010 Nov 1;120(11):3760–72.
21. Thompson JM, Neugebauer V. Cortico-limbic pain mechanisms. *Neurosci Lett*. 2019 May 29;702:15–23.
22. Fakhoury M, Salman I, Najjar W, Merhej G, Lawand N. The Lateral Hypothalamus: An Uncharted Territory for Processing Peripheral Neurogenic Inflammation. *Frontiers in Neuroscience* [Internet]. 2020 [cited 2023 Mar 14];14. Available from: <https://www.frontiersin.org/articles/10.3389/fnins.2020.00101>
23. Fuchs PN, Peng YB, Boyette-Davis JA, Uhelski ML. The anterior cingulate cortex and pain processing. *Front Integr Neurosci*. 2014 May 5;8:35.
24. Ong WY, Stohler CS, Herr DR. Role of the Prefrontal Cortex in Pain Processing. *Mol Neurobiol*. 2019 Feb 1;56(2):1137–66.
25. Harris HN, Peng YB. Evidence and explanation for the involvement of the nucleus accumbens in pain processing. *Neural Regen Res*. 2019 Oct 18;15(4):597–605.
26. Lu C, Yang T, Zhao H, Zhang M, Meng F, Fu H, et al. Insular Cortex is Critical for the Perception, Modulation, and Chronification of Pain. *Neurosci Bull*. 2016 Feb 22;32(2):191–201.
27. Moulton EA, Schmahmann JD, Becerra L, Borsook D. The Cerebellum and Pain: Passive Integrator or Active Participant? *Brain Res Rev*. 2010 Oct 5;65(1):14–27.
28. Markovic T, Pedersen C, Massaly N, Vachez YM, Ruyle B, Murphy CA, et al. Pain induces adaptations in ventral tegmental area dopamine neurons to drive anhedonia-like behavior. *Nat Neurosci*. 2021 Nov;24(11):1601–13.
29. Elman I, Borsook D. Common Brain Mechanisms of Chronic Pain and Addiction. *Neuron*. 2016 Jan 6;89(1):11–36.
30. Wang M, Tutt JO, Dorricott NO, Parker KL, Russo AF, Sowers LP. Involvement of the cerebellum in migraine. *Front Syst Neurosci*. 2022;16:984406.
31. Kong J, Huang Y, Liu J, Yu S, Ming C, Chen H, et al. Altered functional connectivity between hypothalamus and limbic system in fibromyalgia. *Molecular Brain*. 2021 Jan 20;14(1):17.

32. Farrell SF, Campos AI, Kho PF, de Zoete RMJ, Sterling M, Rentería ME, et al. Genetic basis to structural grey matter associations with chronic pain. *Brain*. 2021 Dec 31;144(12):3611–22.
33. Hashmi JA, Baliki MN, Huang L, Baria AT, Torbey S, Hermann KM, et al. Shape shifting pain: chronification of back pain shifts brain representation from nociceptive to emotional circuits. *Brain*. 2013 Sep;136(9):2751–68.
34. Li T, Mamillapalli R, Ding S, Chang H, Liu ZW, Gao XB, et al. Endometriosis alters brain electrophysiology, gene expression and increases pain sensitization, anxiety, and depression in female mice. *Biol Reprod*. 2018 Aug;99(2):349–59.
35. Zangrandi A, Allen Demers F, Schneider C. Complex Regional Pain Syndrome. A Comprehensive Review on Neuroplastic Changes Supporting the Use of Non-invasive Neurostimulation in Clinical Settings. *Front Pain Res (Lausanne)*. 2021 Sep 21;2:732343.
36. Baliki MN, Mansour AR, Baria AT, Apkarian AV. Functional Reorganization of the Default Mode Network across Chronic Pain Conditions. Zang YF, editor. *PLoS ONE*. 2014 Sep 2;9(9):e106133.
